# Supplementary material for: Lanthanide chelate-encapsulated polystyrene nanoparticles for rapid and quantitative immunochromatographic assay of procalcitonin
Source: Royal Society of Chemistry journal article supplement (doi:10.1039/c6ra23816e), 2016-01-01
Supplement: c6ra23816e1.pdf [file c6ra23816e1.pdf]

## Lanthanide chelates-encapsulated polystyrene nanoparticles for rapid and quantitative immunochromatographic assay of procalcitonin

Received 00th January 20xx,  
Accepted 00th January 20xx

DOI: 10.1039/x0xx00000x

Tao Liao,<sup>‡a</sup> Fang Yuan,<sup>‡b,a</sup> Chuan Shi,<sup>a</sup> Chuan-Xin He<sup>\*c</sup> and Zigang Li<sup>\*a</sup>

www.rsc.org/

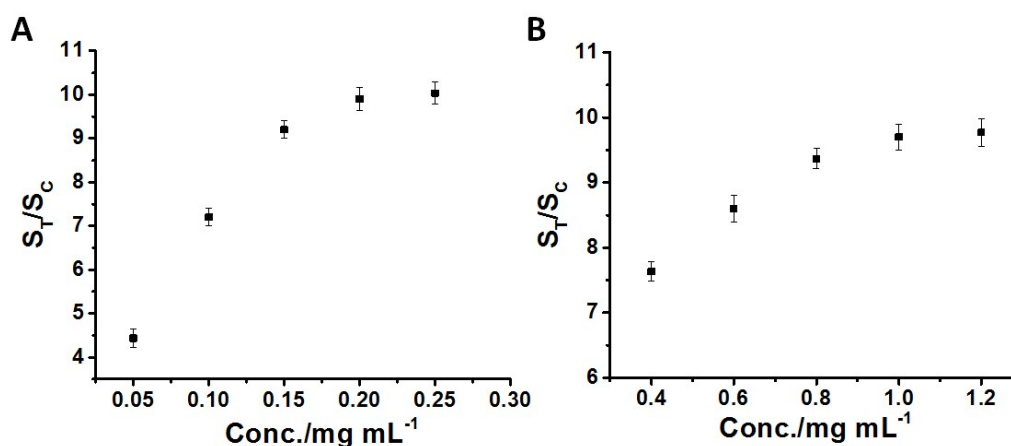

**Fig. S-1.** Concentration optimization graphs of the antibodies labeled on EuPSNs and on the test line. (A) Different concentration of Ab2 was added at 0.05, 0.1, 0.15, 0.2 and 0.25 mg mL<sup>-1</sup> to label the EuPSNs, the concentration of Ab1 on T line was 1 mg mL<sup>-1</sup>. (B) Different concentration of Ab1 was dispensed at the test line at 0.4, 0.6, 0.8, 1.0 and 1.2 mg mL<sup>-1</sup>, the concentration of Ab2 used to label EuPSNs was 0.2 mg mL<sup>-1</sup>.

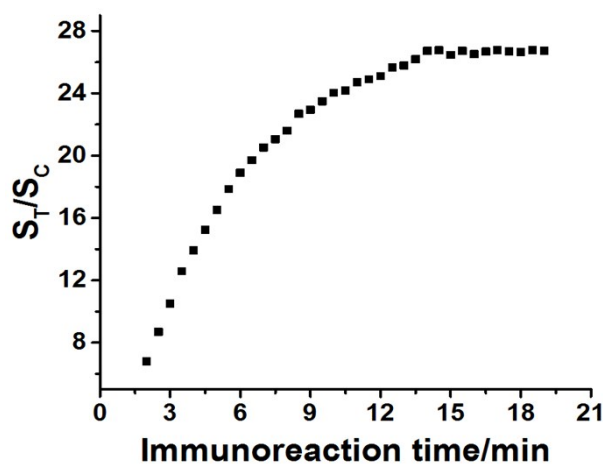

**Fig. S-2.** Immunoreaction kinetic curves of S<sub>T</sub>/S<sub>C</sub> after adding 75 μL of bovine serum containing 50 ng mL<sup>-1</sup> PCT on the sample pad of an IST strip.

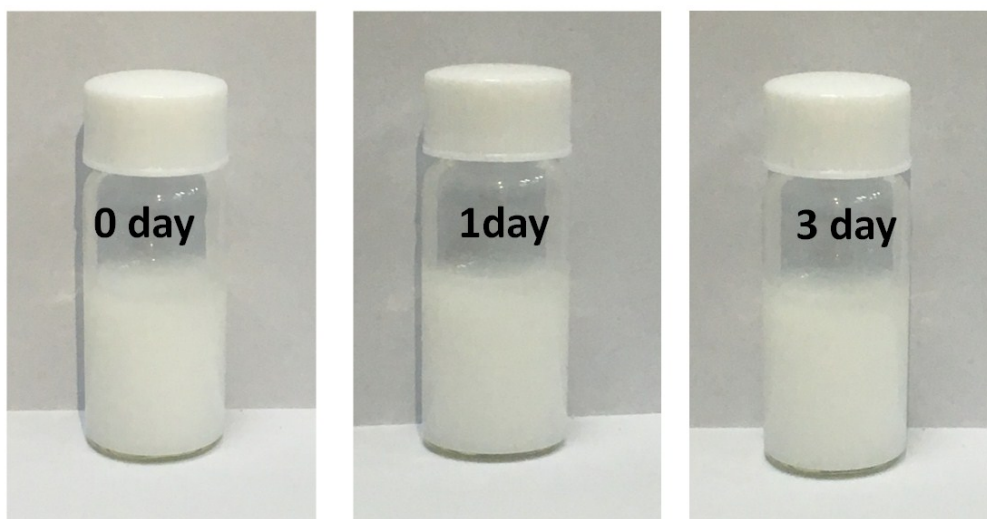

Fig. S-3. The stability of EuPSNs dispersed in deionized water.

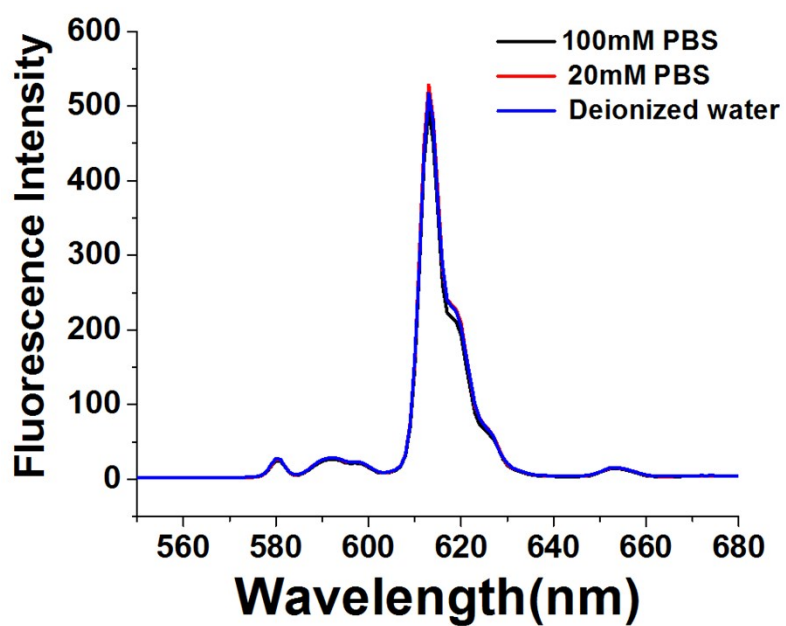

Fig. S-4. Fluorescence spectra of EuPSNs (0.5 mg/mL) dispersed in deionized water, 20mM PBS and 100mM PBS. The excitation wavelength was set at 365 nm and the measurement was carried out under atmospheric condition.
